# Supplementary material for: Novel secreted STPKLRR from Vibrio splendidus AJ01 promotes pathogen internalization via mediating tropomodulin phosphorylation dependent cytoskeleton rearrangement
Source: PLoS Pathog. 2023 May 22;19(5):e1011419. doi: 10.1371/journal.ppat.1011419 (PMC10237653; doi:10.1371/journal.ppat.1011419)
Supplement: S3 Data — (XLSX) [file ppat.1011419.s012.xlsx]

## Sheet: Sheet1
Primers	Sequences (5'-3')
Recombinant expression
AjTmod-F	GCGGCCGCATGCCGACAGTAACCATGGC
AjTmod-R	CTCGAGTCATTCCTTCTTTGTCCTCT
AjTTro-F	AAGCTTAACACAGATTTGTCAGATAA
AjTTro-R	GGATCCTTGATTCAACATACTGTGGA
AjTLRR-F	AAGCTTATCTTGGAAGCTCTGGAGAA
AjTLRR-R	GGATCCATGCTGAAAAGCTAGGCCAA
STPKLRR-F	GGATCCTTGCATACTCTAGAACAATT
STPKLRR-R	GCGGCCGCTTATGCGTGATAGCTTTCGA
STPKLRR Knockout and complement
koSTPKLRR-F1	GGATCCATCGTTAGCCATAAGCAAGA
koSTPKLRR-R1	TTATGCGTGATATAGAGTATGCAAACCTTAGCCTTA
koSTPKLRR-F2	TTGCATACTCTATATCACGCATAAGAGCTGCCAAAC
koSTPKLRR-R2	GGATCCTTGGTTGCTGAAAAGCGGGT
pMPSTPKLRR-F	CTCGAGTTGCATACTCTAGAACAATT
pMPSTPKLRR-R	GGATCCTTATGCGTGATAGCTTTCGA
pDM4-F	TTCCACAGGGTAGCCAGCAG
pDM4-R	GCCAGCAGTGCGGTAGTAAA
pMP-F	AATGGTGAGCAAGGGCGAGGAGCTGTTCAC
pMP-R	CGCTGCCGTCCTCGATGTTGTGGCGGATCT
16s-F	AGAGTTTGATCCTGGCTCAG
16s-R	GGTTACCTTGTTACGACTT
AjTmod mutants
S12A-F	AACACAGATTTGGCAGATAAGTACAAG
S12A-R	ACTTATCTGACAAATCT
S42A-F	GATGGACCCCGATGATGCGCTTCTTCC
S42A-R	CATCATCGGGGTCCATCTCATT
S49A-F	TCGCTTCTTCCTCCTGCGGAGAGGTC
S49A-R	CAGGAGGAAGAAGCGAATCATCGGGG
S52A-F	CCTCCTTCGGAGAGGGCGAGGTACAA
S52A-R	CCCTCTCCGAGGGAGGAAGAAGCGAA
S144A-F	ATCCTGGGGATCCACGCTATGTTGAATC
S144A-R	AGCGTGGATCCCCAGGATACCTGCTAAC
RNAi
siTmod-600-F	CCUCCUUGAAGGAACUAAATT
siTmod-600-R	UUUAGUUCCUUCAAGGAGGTT
siTmod-1016-F	CUCAGGAACUAUGAAAUAATT
siTmod-1016-R	UUAUUUCAUAGUUCCUGAGTT
siNC-F	UUCUCCGAACGUGUCACGUTT
siNC-R	ACGUGACACGUUCGGAGAATT
RT-PCR
qTmod-F	TGAAACCGCACCTTATCTCGCAC
qTmod-R	CTCTGTCTCCACTTGAATACCCAT
qβ-Tubulin-F	GCACATCAAGCCGTCAAACTCAC
qβ-Tubulin-R	TATGCCCGCATAGCAAACATACC
β-lactamase reporter system
pCX340STPKLRR-F	GTATACTTGCATACTCTAGAACAATT
pCX340STPKLRR-R	CTTAAGTTATGCGTGATAGCTTTCGA
